# Supplementary material for: Cryo-seismicity triggered by ice mass discharge through the Antarctic subglacial hydrographic network
Source: Copernicus journal article supplement (doi:10.5194/egusphere-2022-29), 2022-04-13
Supplement: Supplementary file 2 [file egusphere-2022-29-supplement.zip]

| TIME           | LONG       | LAT        | DEPTH     | NUM_PHS | NUM_STAT | STAND_ERR | AZ_GAP  | MIN_DIST       | MAX_DIST       | MED_DIST       |
|----------------|------------|------------|-----------|---------|----------|-----------|---------|----------------|----------------|----------------|
| 03/12/03 18:40 | 160.765985 | -75.34409  | 19.535547 | 8       | 4        | 0.250228  | 186.135 | 0.31135683115  | 0.719561606041 | 0.352535868163 |
| 04/12/03 23:43 | 160.85285  | -75.376281 | 11.585938 | 12      | 6        | 0.402853  | 130.165 | 0.254499021259 | 0.680549934098 | 0.337409278752 |
| 05/12/03 04:08 | 160.976205 | -75.368269 | 10.04375  | 10      | 5        | 0.461153  | 214.441 | 0.239549598204 | 0.667874895384 | 0.316056685862 |
| 05/12/03 05:10 | 160.839957 | -75.400808 | 9.603125  | 7       | 5        | 0.279865  | 125.369 | 0.27906129296  | 0.476631457921 | 0.344572375343 |
| 05/12/03 06:43 | 160.800555 | -75.374294 | 7.69375   | 9       | 6        | 0.374341  | 134.474 | 0.256698761907 | 0.690455062266 | 0.34929741106  |
| 05/12/03 07:45 | 160.828372 | -75.384034 | 6.959375  | 8       | 6        | 0.324953  | 130.113 | 0.263750342619 | 0.678424837143 | 0.34490692298  |
| 05/12/03 09:47 | 160.817092 | -75.375659 | 6.371875  | 9       | 6        | 0.225336  | 132.929 | 0.256629514143 | 0.686737266747 | 0.345681238883 |
| 05/12/03 10:48 | 160.849977 | -75.372788 | -0.971875 | 8       | 6        | 0.31584   | 131.185 | 0.251349596995 | 0.683743425121 | 0.337333735737 |
| 05/12/03 11:42 | 160.844334 | -75.368601 | 0.05625   | 8       | 6        | 0.20739   | 132.581 | 0.247755907858 | 0.687923471945 | 0.337807678223 |
| 05/12/03 13:51 | 160.489725 | -75.353027 | 14.964063 | 11      | 6        | 0.279792  | 163.898 | 0.24794746336  | 0.758402406879 | 0.420685560138 |
| 05/12/03 14:44 | 160.826854 | -75.339242 | -0.678125 | 7       | 5        | 0.469159  | 185.12  | 0.316663727946 | 0.713921060929 | 0.357946186945 |
| 05/12/03 15:51 | 160.872893 | -75.397933 | 14.596875 | 8       | 6        | 0.334643  | 123.837 | 0.274124017343 | 0.660486968392 | 0.338133232645 |
| 05/12/03 16:53 | 160.838888 | -75.370013 | -0.678125 | 8       | 6        | 0.267829  | 132.659 | 0.249524873457 | 0.687675259182 | 0.339375195782 |
| 05/12/03 18:43 | 160.883166 | -75.37831  | 6.371875  | 8       | 6        | 0.324855  | 127.495 | 0.254397397917 | 0.674168347983 | 0.3307722853   |
| 05/12/03 19:35 | 160.827707 | -75.364438 | -0.678125 | 7       | 5        | 0.350045  | 177.098 | 0.315434355311 | 0.693819424393 | 0.353925320044 |
| 06/12/03 00:58 | 160.388075 | -75.331382 | 6.078125  | 10      | 6        | 0.270048  | 178.711 | 0.242544339151 | 0.791898539413 | 0.443658730561 |
| 06/12/03 01:34 | 160.849779 | -75.367189 | -0.971875 | 8       | 6        | 0.43786   | 132.499 | 0.245991438867 | 0.688177080638 | 0.336244657272 |
| 06/12/03 06:49 | 160.827612 | -75.361638 | 12.246875 | 7       | 5        | 0.222859  | 135.505 | 0.24244271581  | 0.5125269805   | 0.326624614054 |
| 06/12/03 07:03 | 160.770217 | -75.370854 | -0.017187 | 12      | 6        | 1.90339   | 137.574 | 0.256152873692 | 0.69801745765  | 0.355795908985 |
| 06/12/03 07:14 | 160.861274 | -75.381161 | -0.678125 | 8       | 6        | 0.935443  | 128.435 | 0.258614316928 | 0.67539322401  | 0.336542332724 |
| 06/12/03 10:37 | 160.816813 | -75.367261 | 7.253125  | 9       | 6        | 0.306139  | 134.977 | 0.248672316574 | 0.693331992083 | 0.344052567455 |
| 06/12/03 12:09 | 160.8385   | -75.358814 | -0.971875 | 8       | 6        | 0.383457  | 135.331 | 0.238870610391 | 0.696555160719 | 0.337375104531 |
| 06/12/03 15:36 | 160.839082 | -75.375612 | 10.778125 | 9       | 6        | 0.308757  | 131.329 | 0.254870441082 | 0.683260489418 | 0.340496649825 |
| 06/12/03 18:03 | 160.446141 | -75.39225  | 18.489063 | 11      | 6        | 0.297596  | 154.598 | 0.216908277453 | 0.737780962456 | 0.437556833465 |
| 06/12/03 18:21 | 162.121783 | -75.205407 | 6.51875   | 3       | 2        | 0.0831367 | 245.128 | 0.264332203698 | 0.706196787656 | 0.485264046016 |
| 06/12/03 19:50 | 160.9026   | -75.383162 | 16.873438 | 11      | 6        | 0.316482  | 125.034 | 0.257933530472 | 0.667292134984 | 0.329245237213 |
| 06/12/03 23:23 | 160.828087 | -75.375636 | 12.540625 | 9       | 6        | 0.316562  | 132.129 | 0.255736487789 | 0.684995280796 | 0.343087595372 |
| 08/12/03 00:34 | 160.69265  | -75.345793 | 4.976563  | 8       | 4        | 0.238876  | 156.64  | 0.241510119305 | 0.729952367876 | 0.528921613375 |
| 09/12/03 07:17 | 160.583509 | -75.379538 | 19.664063 | 13      | 7        | 0.353977  | 148.764 | 0.253480089879 | 0.722709231662 | 0.41424641744  |
| 10/12/03 15:39 | 160.784057 | -75.285435 | 16.139063 | 11      | 7        | 0.324148  | 159.154 | 0.177262583778 | 0.763901758499 | 0.382094770707 |
| 11/12/03 05:27 | 160.838985 | -75.372812 | 7.253125  | 12      | 7        | 0.343064  | 131.994 | 0.252195858626 | 0.685465625996 | 0.350203927239 |
| 11/12/03 10:50 | 160.825031 | -75.366543 | 10.557813 | 11      | 7        | 0.37578   | 134.528 | 0.247314340949 | 0.692590051758 | 0.354361491023 |
| 11/12/03 13:11 | 160.808093 | -75.35258  | -0.898438 | 10      | 6        | 0.27914   | 181.679 | 0.316459581942 | 0.706243552379 | 0.44165324338  |
| 11/12/03 14:33 | 160.805825 | -75.367284 | -0.971875 | 10      | 6        | 0.403162  | 177.107 | 0.309191264723 | 0.695064085496 | 0.434655621965 |
| 11/12/03 15:23 | 160.849482 | -75.35879  | 4.903125  | 9       | 6        | 0.268212  | 177.977 | 0.320382422787 | 0.694860838813 | 0.430808324134 |
| 11/12/03 17:35 | 160.824843 | -75.360944 | 13.201562 | 11      | 7        | 0.348054  | 135.886 | 0.242013739404 | 0.697018311346 | 0.355069257127 |
| 11/12/03 19:06 | 160.867131 | -75.390947 | 15.33125  | 10      | 7        | 0.33802   | 125.802 | 0.267699263791 | 0.666829883678 | 0.341863618666 |
| 11/12/03 22:59 | 160.827612 | -75.361638 | 18.709375 | 11      | 7        | 0.326234  | 135.505 | 0.24244271581  | 0.696036252152 | 0.354285048687 |
| 12/12/03 00:53 | 160.827517 | -75.358839 | 4.609375  | 10      | 7        | 0.416248  | 136.184 | 0.239794213681 | 0.698257576519 | 0.354667260369 |
| 12/12/03 02:46 | 160.849878 | -75.369988 | 11.071875 | 10      | 7        | 0.294744  | 131.841 | 0.248668719288 | 0.685958454236 | 0.34772899418  |
| 12/12/03 03:22 | 160.693129 | -75.475278 | 20.03125  | 9       | 6        | 1.02428   | 114.438 | 0.250878352474 | 0.635062247271 | 0.427684080876 |
| 12/12/03 03:42 | 160.830716 | -75.37213  | 8.501562  | 10      | 6        | 0.270566  | 142.113 | 0.252183268124 | 0.687312832575 | 0.42761932972  |
| 12/12/03 05:58 | 160.446058 | -75.382451 | 19.957813 | 12      | 7        | 0.439495  | 157.836 | 0.222011927567 | 0.744738114399 | 0.442927582096 |
| 12/12/03 06:07 | 160.849878 | -75.369988 | -0.971875 | 11      | 7        | 0.315129  | 131.841 | 0.248668719288 | 0.685958454236 | 0.34772899418  |
| 12/12/03 07:59 | 160.869035 | -75.367844 | 10.264063 | 11      | 7        | 0.284857  | 130.888 | 0.245218921607 | 0.684641847405 | 0.343121769593 |
| 12/12/03 10:09 | 160.82489  | -75.362344 | -0.898438 | 10      | 7        | 0.305122  | 135.546 | 0.243337540808 | 0.695909447806 | 0.354883996876 |
| 12/12/03 11:04 | 160.882744 | -75.367112 | -0.971875 | 10      | 7        | 0.292104  | 130.012 | 0.243567767139 | 0.683086021027 | 0.339745716284 |
| 12/12/03 12:00 | 160.858046 | -75.36787  | 3.360938  | 10      | 7        | 0.268417  | 131.715 | 0.246031908339 | 0.686342464562 | 0.345890780817 |
| 12/12/03 15:24 | 160.821792 | -75.351851 | -0.53125  | 9       | 6        | 0.437627  | 181.336 | 0.31986891015  | 0.704675135498 | 0.439495770848 |
| 12/12/03 22:33 | 160.814089 | -75.367966 | 12.320313 | 11      | 7        | 0.34158   | 135.012 | 0.249568040894 | 0.693214180953 | 0.356968624359 |
| 13/12/03 02:30 | 160.880705 | -75.386015 | 10.117188 | 11      | 7        | 0.323323  | 125.961 | 0.262041631568 | 0.668509816438 | 0.338670127643 |
| 13/12/03 08:31 | 160.517892 | -75.407599 | 19.664063 | 13      | 7        | 0.339899  | 144.609 | 0.225934768412 | 0.714031677486 | 0.429945874714 |
| 13/12/03 12:29 | 161.607218 | -75.484665 | 21.353125 | 8       | 5        | 0.310104  | 132.897 | 0.29524548458  | 0.657494925409 | 0.479765593717 |
| 14/12/03 19:16 | 160.399038 | -75.331378 | 21.353125 | 12      | 7        | 0.309114  | 177.835 | 0.244539933795 | 0.790004568111 | 0.466426855659 |

|                |            |            |           |    |   |          |         |                |                |                |
|----------------|------------|------------|-----------|----|---|----------|---------|----------------|----------------|----------------|
| 15/12/03 04:08 | 160.783755 | -75.275637 | 14.229687 | 11 | 7 | 0.290214 | 162.117 | 0.168900691486 | 0.771984861093 | 0.385382690498 |
| 15/12/03 13:51 | 160.40179  | -75.333477 | 12.320313 | 13 | 7 | 0.380699 | 176.956 | 0.243583055606 | 0.787983792463 | 0.465392635812 |
| 15/12/03 14:02 | 160.499881 | -75.398864 | 21.316406 | 14 | 7 | 0.25656  | 148.646 | 0.225660475322 | 0.723445776057 | 0.434586374201 |
| 16/12/03 03:54 | 160.88285  | -75.369911 | 9.603125  | 11 | 7 | 0.293616 | 129.381 | 0.246272027208 | 0.680850307514 | 0.339417463898 |
| 19/12/03 04:48 | 160.553472 | -75.392868 | 21.353125 | 13 | 7 | 0.330828 | 146.837 | 0.240483993352 | 0.71822251617  | 0.421181985665 |
| 20/12/03 05:24 | 159.075672 | -75.094255 | 20.9125   | 4  | 2 | 0.196097 | 317.5   | 0.568195887227 | 0.99553103132  | 0.781863009613 |
| 21/12/03 08:40 | 160.4183   | -75.34327  | 17.460938 | 13 | 7 | 0.258503 | 172.557 | 0.240037929836 | 0.777932074873 | 0.459757486629 |
| 25/12/03 14:28 | 160.859257 | -75.782918 | -0.53125  | 3  | 2 | 0.242101 | 181.434 | 0.441500358707 | 0.458628838014 | 0.45006459836  |
| 27/12/03 08:58 | 160.863693 | -75.372056 | 4.829688  | 10 | 7 | 0.281929 | 130.333 | 0.249657073733 | 0.682155223165 | 0.344037278987 |
| 28/12/03 05:09 | 160.869189 | -75.372043 | 8.207812  | 10 | 7 | 0.299765 | 129.926 | 0.249260472904 | 0.681301766961 | 0.342650525071 |
| 28/12/03 08:50 | 160.886259 | -75.387402 | 9.529687  | 11 | 7 | 0.34371  | 125.264 | 0.263047073123 | 0.666543000086 | 0.337188944958 |
| 28/12/03 11:36 | 160.869497 | -75.380442 | 11.439063 | 11 | 7 | 0.313273 | 128.007 | 0.257361561931 | 0.674651283685 | 0.341862719344 |
| 28/12/03 14:36 | 160.829478 | -75.335736 | 5.417187  | 11 | 7 | 0.338585 | 141.618 | 0.217842672602 | 0.71632404826  | 0.35796057609  |
| 28/12/03 16:18 | 160.87699  | -75.360126 | -0.825    | 9  | 6 | 0.294073 | 176.399 | 0.314928936569 | 0.689530559655 | 0.425070652289 |
| 28/12/03 18:31 | 160.76468  | -75.369465 | 11.439063 | 10 | 5 | 0.435836 | 138.34  | 0.25537316186  | 0.699987871288 | 0.513416409568 |
| 28/12/03 19:48 | 160.841611 | -75.369307 | 6.885938  | 10 | 7 | 0.302634 | 132.621 | 0.248639940996 | 0.687798466242 | 0.349884668069 |
| 29/12/03 01:02 | 160.863642 | -75.370656 | 7.473437  | 10 | 7 | 0.238177 | 130.656 | 0.248310789289 | 0.683265885348 | 0.344187465696 |
| 29/12/03 03:24 | 160.838791 | -75.367213 | 7.253125  | 10 | 7 | 0.36776  | 133.326 | 0.246856586252 | 0.689888489654 | 0.350818163896 |
| 29/12/03 10:45 | 160.838749 | -75.28672  | 19.370313 | 12 | 7 | 0.265043 | 153.368 | 0.171769527409 | 0.754839294677 | 0.368461954483 |
| 29/12/03 13:21 | 160.886153 | -75.384602 | -0.604687 | 10 | 7 | 0.320914 | 125.889 | 0.260327524587 | 0.668752633272 | 0.337374205209 |
| 29/12/03 17:33 | 160.860869 | -75.369963 | 6.078125  | 9  | 6 | 0.306488 | 173.963 | 0.32066391045  | 0.684247944542 | 0.423075057645 |
| 29/12/03 20:31 | 160.860363 | -75.355965 | 8.721875  | 8  | 5 | 0.315421 | 214.996 | 0.326644399129 | 0.695413921601 | 0.513728474165 |
| 30/12/03 08:00 | 160.85285  | -75.376281 | 10.264063 | 11 | 7 | 0.259795 | 130.165 | 0.254499021259 | 0.680549934098 | 0.346394400917 |
| 30/12/03 09:02 | 160.586396 | -75.387233 | 19.590625 | 12 | 7 | 0.336482 | 146.254 | 0.250485348932 | 0.716564167129 | 0.413078198674 |
| 30/12/03 11:28 | 160.919213 | -75.38592  | 10.264063 | 11 | 7 | 0.19872  | 123.268 | 0.259702496071 | 0.66251313997  | 0.328934071938 |
| 30/12/03 16:41 | 160.642924 | -75.457154 | 19.884375 | 5  | 3 | 0.395005 | 139.45  | 0.348559967344 | 0.65673949526  | 0.442337627122 |
| 30/12/03 22:33 | 160.431821 | -75.317367 | 16.065625 | 12 | 7 | 0.38674  | 179.595 | 0.257888564392 | 0.794810542773 | 0.4607719214   |
| 31/12/03 04:36 | 160.404637 | -75.352374 | 14.74375  | 13 | 7 | 0.56072  | 170.745 | 0.23144401257  | 0.77368547825  | 0.455097202067 |
| 03/01/04 10:06 | 160.605933 | -75.401909 | 19.517188 | 13 | 7 | 0.308386 | 140.534 | 0.248599471524 | 0.702473596207 | 0.407696658184 |
| 03/01/04 11:27 | 160.849383 | -75.35599  | 11.953125 | 7  | 5 | 0.190412 | 178.868 | 0.319067614599 | 0.697096552325 | 0.349556415683 |
| 03/01/04 16:32 | 161.016555 | -75.40875  | 14.890625 | 9  | 6 | 0.328053 | 155.47  | 0.303793536444 | 0.629281407988 | 0.39642725914  |
| 03/01/04 21:22 | 161.006824 | -75.436777 | -0.971875 | 6  | 3 | 0.281059 | 213.781 | 0.306635392719 | 0.608856015674 | 0.424636279953 |
| 04/01/04 00:38 | 160.79273  | -75.387609 | 4.389063  | 8  | 4 | 0.369957 | 142.199 | 0.269971849489 | 0.681462745528 | 0.502359250423 |
| 04/01/04 02:58 | 160.461947 | -75.31805  | 21.132812 | 12 | 7 | 0.261623 | 176.969 | 0.2530771938   | 0.78921406442  | 0.453119593856 |
| 04/01/04 07:08 | 160.85275  | -75.373481 | 12.614063 | 10 | 7 | 0.218912 | 130.819 | 0.251812747622 | 0.682760466605 | 0.346665996042 |
| 04/01/04 19:35 | 160.817371 | -75.384058 | 13.715625 | 8  | 4 | 0.397717 | 141.122 | 0.264616389326 | 0.680183910205 | 0.505929557198 |
| 04/01/04 20:39 | 160.963341 | -75.388603 | 16.285937 | 8  | 4 | 0.339455 | 132.735 | 0.260219605994 | 0.653521722554 | 0.509741781486 |
| 04/01/04 21:18 | 160.877824 | -75.382522 | 10.925    | 8  | 4 | 0.420428 | 137.231 | 0.258831952756 | 0.671701508817 | 0.509767861813 |
| 04/01/04 22:27 | 160.827992 | -75.372836 | 9.603125  | 8  | 4 | 0.338122 | 142.191 | 0.253070898549 | 0.687195021444 | 0.514435340947 |
| 04/01/04 23:36 | 160.748398 | -75.280604 | 21.353125 | 8  | 4 | 0.399301 | 166.77  | 0.178000027495 | 0.773136892071 | 0.581177594609 |
| 05/01/04 09:49 | 160.853149 | -75.384679 | 14.376563 | 10 | 7 | 0.257167 | 128.208 | 0.262574029958 | 0.673944416903 | 0.345718111069 |
| 05/01/04 13:35 | 160.854851 | -75.432271 | 17.020313 | 8  | 4 | 0.401368 | 131.455 | 0.308688543945 | 0.637327638396 | 0.474430817951 |
| 06/01/04 03:44 | 160.624765 | -75.380188 | 20.03125  | 13 | 7 | 0.303129 | 145.611 | 0.262377078527 | 0.715152232207 | 0.403768421409 |
| 06/01/04 09:07 | 160.857995 | -75.36647  | 12.760937 | 10 | 7 | 0.294799 | 132.041 | 0.244690120503 | 0.687454925388 | 0.346058054636 |
| 07/01/04 05:17 | 160.73284  | -75.510208 | 21.353125 | 14 | 7 | 0.235601 | 110.333 | 0.259538819539 | 0.60415526164  | 0.402653262618 |
| 07/01/04 06:15 | 160.89144  | -75.37899  | 16.726563 | 11 | 7 | 0.267389 | 126.744 | 0.254536792766 | 0.672332832585 | 0.336424521593 |
| 07/01/04 09:10 | 160.858247 | -75.373469 | 11.879687 | 10 | 7 | 0.304456 | 130.415 | 0.251404455613 | 0.681901614472 | 0.345279242125 |
| 08/01/04 00:12 | 160.402073 | -75.385271 | 14.670313 | 13 | 7 | 0.288684 | 160.167 | 0.211117545633 | 0.750652952601 | 0.433919077569 |
| 08/01/04 09:59 | 160.22331  | -75.381765 | 18.709375 | 8  | 4 | 0.354316 | 178.082 | 0.34119362407  | 0.785960318849 | 0.492975728787 |
| 08/01/04 10:39 | 160.530315 | -75.311699 | 15.478125 | 13 | 7 | 0.249377 | 173.427 | 0.236681661602 | 0.782685888882 | 0.437428230476 |
| 09/01/04 22:52 | 160.528656 | -75.389392 | 17.020313 | 13 | 7 | 0.296045 | 149.653 | 0.236538669467 | 0.725101427134 | 0.427595048037 |
| 09/01/04 22:58 | 160.794898 | -75.282614 | 14.670313 | 14 | 7 | 0.242207 | 158.92  | 0.173420681877 | 0.764617618498 | 0.380379764404 |
| 10/01/04 00:14 | 160.401858 | -75.346076 | 13.642188 | 13 | 7 | 0.320675 | 172.971 | 0.235041298993 | 0.778748658892 | 0.458957989721 |
| 10/01/04 23:31 | 160.536292 | -75.34669  | 12.39375  | 7  | 4 | 0.305768 | 167.044 | 0.263302480459 | 0.75516035249  | 0.523573347785 |
| 11/01/04 14:02 | 160.759242 | -75.277784 | 20.471875 | 12 | 7 | 0.249733 | 166.551 | 0.174109562227 | 0.773830269029 | 0.572166392118 |

|                |            |            |           |    |   |             |         |                 |                |                |
|----------------|------------|------------|-----------|----|---|-------------|---------|-----------------|----------------|----------------|
| 11/01/04 18:25 | 160.396365 | -75.344678 | 19.957813 | 13 | 7 | 0.414487    | 173.851 | 0.234931581757  | 0.780727166425 | 0.45893460736  |
| 12/01/04 07:12 | 160.572582 | -75.383749 | 19.223438 | 8  | 4 | 0.199142    | 157.084 | 0.289606738111  | 0.72150953664  | 0.497427370736 |
| 13/01/04 22:11 | 160.8475   | -75.380493 | 11.292188 | 12 | 6 | 0.302395    | 171.19  | 0.313293070567  | 0.67810917526  | 0.420448139234 |
| 15/01/04 03:32 | 160.819804 | -75.456846 | 21.353125 | 6  | 3 | 0.300014    | 251.973 | 0.431689659308  | 0.625269534304 | 0.482213547129 |
| 15/01/04 14:16 | 160.512094 | -75.385206 | 16.432813 | 14 | 8 | 0.297441    | 152.148 | 0.234913595325  | 0.731038748376 | 0.420301549813 |
| 16/01/04 19:34 | 160.451288 | -75.351652 | 15.551563 | 13 | 7 | 0.209407    | 167.316 | 0.241067653075  | 0.766061928997 | 0.450331696877 |
| 18/01/04 19:49 | 160.517614 | -75.386602 | 19.517188 | 13 | 7 | 0.256879    | 151.313 | 0.235439698465  | 0.729059341521 | 0.430515145291 |
| 19/01/04 09:30 | 160.475892 | -75.342538 | 15.478125 | 7  | 4 | 0.0934744   | 171.812 | 0.269301854892  | 0.768535962735 | 0.525315333736 |
| 19/01/04 11:28 | 160.865262 | -75.264261 | 20.104688 | 12 | 7 | 0.316819    | 156.965 | 0.14860300284   | 0.769754543511 | 0.37821599662  |
| 19/01/04 23:38 | 160.778025 | -75.446432 | 17.020313 | 8  | 4 | 0.347375    | 133.764 | 0.327399829278  | 0.640110139445 | 0.46188618087  |
| 20/01/04 00:15 | 158.53417  | -75.569649 | 15.91875  | 5  | 3 | 0.00912995  | 343.89  | 0.162859048937  | 0.847693351166 | 0.847693351166 |
| 20/01/04 09:58 | 160.823673 | -75.407842 | 19.44375  | 8  | 4 | 0.489069    | 136.994 | 0.286982517665  | 0.660940226481 | 0.489553810076 |
| 21/01/04 11:33 | 160.523306 | -75.400595 | 16.285937 | 8  | 4 | 0.314915    | 156.76  | 0.310497979016  | 0.718027363382 | 0.484244215315 |
| 23/01/04 05:12 | 160.925214 | -75.602185 | 20.471875 | 4  | 4 | 0.00595099  | 127.857 | 0.302442755392  | 0.508603240333 | 0.469283101079 |
| 23/01/04 06:55 | 161.558671 | -75.500326 | 20.03125  | 5  | 4 | 0.272722    | 164.422 | 0.317021657946  | 0.641372786979 | 0.429835258157 |
| 23/01/04 16:08 | 160.431967 | -75.336964 | 13.421875 | 8  | 4 | 0.523787    | 175.804 | 0.272248931795  | 0.780204660572 | 0.528690487723 |
| 25/01/04 11:51 | 161.041094 | -75.232284 | 19.003125 | 8  | 4 | 0.348364    | 145.229 | 0.102425536341  | 0.773787101592 | 0.633631426596 |
| 26/01/04 01:53 | 160.622001 | -75.379491 | 19.810938 | 8  | 4 | 0.2687      | 154.798 | 0.27979513939   | 0.716140586652 | 0.501926676731 |
| 27/01/04 16:12 | 160.925789 | -75.616182 | 20.471875 | 4  | 4 | 0.00145261  | 131.539 | 0.292742672551  | 0.500222462287 | 0.475442554758 |
| 28/01/04 05:29 | 160.434501 | -75.309666 | 19.957813 | 8  | 4 | 0.216683    | 182.073 | 0.251943149255  | 0.800148915826 | 0.549774183452 |
| 28/01/04 22:27 | 160.614085 | -75.536282 | 19.223438 | 8  | 4 | 0.258034    | 126.996 | 0.403944688444  | 0.610618686022 | 0.415118759398 |
| 29/01/04 10:00 | 161.683868 | -75.95747  | 20.178125 | 6  | 3 | 0.615036    | 218.03  | 0.151157076201  | 0.708054786094 | 0.229561732448 |
| 30/01/04 04:17 | 160.44298  | -75.342558 | 18.415625 | 8  | 4 | 0.346112    | 173.859 | 0.274654617091  | 0.774180105134 | 0.524654332355 |
| 31/01/04 07:02 | 160.479103 | -75.386631 | 19.957813 | 8  | 4 | 0.232657    | 162.213 | 0.304539973377  | 0.735863608792 | 0.493035983334 |
| 03/02/04 23:20 | 159.915906 | -75.970744 | 20.9125   | 3  | 3 | 0.495075    | 241.023 | 0.37404943962   | 0.657258403826 | 0.49060871432  |
| 04/02/04 05:29 | 162.405274 | -75.841728 | 0.64375   | 3  | 3 | 1.76511E-05 | 219.506 | 0.0736038976505 | 0.842892772434 | 0.150219983088 |
| 05/02/04 21:16 | 159.341308 | -75.15994  | 20.61875  | 6  | 3 | 0.921662    | 260.016 | 0.462054354011  | 0.900661595112 | 0.506738946644 |
| 06/02/04 02:29 | 160.371636 | -75.332786 | 17.3875   | 8  | 4 | 0.367855    | 180.421 | 0.279661140471  | 0.79372236363  | 0.530937892416 |
| 06/02/04 07:59 | 160.550494 | -75.378173 | 19.957813 | 8  | 4 | 0.323121    | 159.57  | 0.287649814296  | 0.729423566772 | 0.500821410477 |
| 07/02/04 02:53 | 160.366366 | -75.401378 | 0.203125  | 4  | 4 | 0.0555775   | 165.75  | 0.333047568963  | 0.745995366004 | 0.480505735399 |
| 09/02/04 22:30 | 160.448453 | -75.341155 | 17.09375  | 8  | 4 | 0.366448    | 173.836 | 0.272681505487  | 0.774270936616 | 0.525815356549 |
| 10/02/04 18:28 | 160.586396 | -75.387233 | 19.590625 | 8  | 4 | 0.245299    | 155.542 | 0.290932338158  | 0.716564167129 | 0.495340045289 |
| 11/02/04 05:39 | 160.360801 | -75.380382 | 11.21875  | 4  | 4 | 0.290742    | 170.516 | 0.317209616161  | 0.761565320967 | 0.49535173647  |
| 11/02/04 06:49 | 160.405018 | -75.419565 | 18.85625  | 4  | 4 | 0.358383    | 159.792 | 0.342462566855  | 0.726413537357 | 0.468640086131 |
| 11/02/04 15:09 | 160.785763 | -75.428918 | -0.384375 | 6  | 3 | 0.570313    | 136.051 | 0.309988063666  | 0.487581597795 | 0.459773674418 |
| 07/11/05 04:24 | 160.95399  | -75.36273  | 5.34375   | 4  | 3 | 0.00135179  | 210.588 | 0.318286104124  | 0.347189401216 | 0.347189401216 |
| 08/11/05 03:05 | 160.7993   | -75.3351   | -0.53125  | 4  | 3 | 0.369089    | 191.284 | 0.324843957274  | 0.361404977841 | 0.325820620538 |
| 10/11/05 21:06 | 160.278533 | -75.300592 | -0.090625 | 5  | 3 | 0.202168    | 245.51  | 0.247948362681  | 0.833522740622 | 0.498208881212 |
| 10/11/05 23:19 | 161.200483 | -75.724518 | -0.090625 | 4  | 3 | 0.09453     | 182.625 | 0.384876372434  | 0.440583949991 | 0.412692389705 |
| 13/11/05 21:38 | 160.360589 | -75.301992 | 19.44375  | 6  | 3 | 0.210158    | 241.992 | 0.259913836648  | 0.818406043748 | 0.477484914125 |
| 16/11/05 00:33 | 160.053275 | -75.664395 | 12.540625 | 6  | 4 | 0.218435    | 219.402 | 0.190462826309  | 0.669169019175 | 0.407774899164 |
| 18/11/05 10:58 | 160.531695 | -75.409686 | -1.559375 | 7  | 5 | 0.471347    | 177.186 | 0.227969033884  | 0.710075561742 | 0.417420123387 |
| 18/11/05 16:33 | 160.360664 | -75.329988 | 8.28125   | 9  | 5 | 0.255547    | 211.594 | 0.239268110541  | 0.797680278018 | 0.431458533656 |
| 19/11/05 06:45 | 160.410017 | -75.334174 | -1.853125 | 5  | 5 | 0.313944    | 207.869 | 0.245437456758  | 0.786048452367 | 0.420295254561 |
| 19/11/05 18:07 | 160.615971 | -75.213616 | 20.471875 | 5  | 5 | 0.246822    | 233.272 | 0.354498187907  | 0.847598922398 | 0.412056569329 |
| 21/11/05 00:30 | 161.107805 | -75.467259 | 19.590625 | 5  | 5 | 0.273923    | 138.86  | 0.160961480349  | 0.569041249537 | 0.333004401526 |
| 21/11/05 02:42 | 160.420944 | -75.32857  | 11.071875 | 6  | 5 | 0.214144    | 209.044 | 0.251291141091  | 0.788310246206 | 0.416224025651 |
| 22/11/05 15:22 | 160.602635 | -75.082046 | 19.590625 | 4  | 4 | 0.238943    | 263.569 | 0.38653741944   | 0.543175860829 | 0.49783296478  |
| 23/11/05 12:09 | 160.648724 | -75.219172 | -1.853125 | 5  | 5 | 0.103788    | 230.856 | 0.345924055717  | 0.83823698448  | 0.405224423089 |
| 24/11/05 21:07 | 160.759978 | -75.30298  | -1.853125 | 5  | 5 | 0.177394    | 202.855 | 0.318156601812  | 0.753251092721 | 0.334315612427 |
| 25/11/05 05:43 | 160.370951 | -75.131208 | 18.5625   | 4  | 4 | 0.198849    | 258.406 | 0.406911550422  | 0.538913076417 | 0.467420606033 |
| 29/11/05 05:18 | 160.982381 | -75.38365  | 21.353125 | 4  | 4 | 0.0875398   | 168.705 | 0.236566548437  | 0.346082336319 | 0.306904289879 |
| 29/11/05 11:28 | 160.39892  | -75.308981 | -1.853125 | 7  | 5 | 0.254346    | 184.016 | 0.258028858562  | 0.46645563395  | 0.334289532101 |
| 30/11/05 10:59 | 160.416208 | -75.444757 | -0.2375   | 5  | 4 | 0.283203    | 168.48  | 0.190838742741  | 0.459395060022 | 0.33240185605  |
| 30/11/05 16:19 | 160.758997 | -75.269385 | -1.853125 | 5  | 5 | 0.202403    | 165.938 | 0.167187483827  | 0.388926916947 | 0.351741767185 |

|                |            |            |           |    |   |            |         |                 |                |                |
|----------------|------------|------------|-----------|----|---|------------|---------|-----------------|----------------|----------------|
| 30/11/05 17:06 | 160.615588 | -75.194019 | 20.765625 | 4  | 4 | 0.125395   | 238.293 | 0.355946995015  | 0.453231109735 | 0.40837204871  |
| 01/12/05 03:17 | 161.095256 | -75.22651  | 20.765625 | 6  | 6 | 0.371496   | 133.952 | 0.0943685140739 | 0.772171919988 | 0.363382586052 |
| 03/12/05 21:07 | 160.410354 | -75.390167 | 11.659375 | 7  | 6 | 0.428768   | 156.954 | 0.211756963294  | 0.745716576306 | 0.377530713557 |
| 05/12/05 01:43 | 160.517466 | -75.375403 | -1.926563 | 10 | 6 | 0.318547   | 154.009 | 0.242660351639  | 0.73719550409  | 0.348382800987 |
| 05/12/05 15:10 | 160.443279 | -75.378953 | -1.265625 | 6  | 5 | 0.391753   | 191.751 | 0.224773744219  | 0.747727459417 | 0.425828780403 |
| 07/12/05 07:35 | 160.333239 | -75.306194 | -1.853125 | 6  | 6 | 0.365161   | 190.088 | 0.252190462697  | 0.819950178945 | 0.388366639586 |
| 08/12/05 17:20 | 160.761953 | -75.37017  | -0.384375 | 6  | 5 | 0.309686   | 137.728 | 0.251098686267  | 0.36596273974  | 0.299795152584 |
| 10/12/05 07:02 | 160.355115 | -75.300593 | 12.246875 | 7  | 6 | 0.247448   | 190.104 | 0.260081110467  | 0.820382752638 | 0.386618358384 |
| 10/12/05 10:42 | 160.761542 | -75.263081 | -1.045313 | 8  | 6 | 0.288468   | 167.739 | 0.161671944418  | 0.785568214629 | 0.358885978023 |
| 10/12/05 17:41 | 160.404385 | -75.307579 | 10.63125  | 9  | 6 | 0.331133   | 184.024 | 0.256051250351  | 0.806794902494 | 0.375462273863 |
| 11/12/05 03:47 | 160.926863 | -75.303306 | -1.045313 | 9  | 6 | 0.506954   | 139.796 | 0.178937120608  | 0.728420823181 | 0.326862034958 |
| 11/12/05 14:31 | 161.922262 | -75.426725 | 19.590625 | 5  | 3 | 0.400263   | 155.432 | 0.204435586101  | 0.502565195071 | 0.322419386224 |
| 12/12/05 19:27 | 160.426434 | -75.329968 | 21.20625  | 6  | 6 | 0.432428   | 175.241 | 0.251367583427  | 0.786332637994 | 0.36366677168  |
| 13/12/05 03:16 | 161.022307 | -75.296739 | 1.671875  | 7  | 5 | 0.297989   | 131.369 | 0.166798077571  | 0.39334708264  | 0.316424508399 |
| 13/12/05 03:26 | 161.064668 | -75.268608 | 21.353125 | 5  | 5 | 0.295206   | 131.463 | 0.137253564174  | 0.417733986628 | 0.316994678297 |
| 13/12/05 09:15 | 160.96594  | -75.257704 | -1.559375 | 6  | 6 | 0.237198   | 146.276 | 0.132325281773  | 0.761525750817 | 0.353427995196 |
| 13/12/05 12:32 | 160.765138 | -75.384863 | -1.045313 | 7  | 5 | 0.256094   | 133.746 | 0.236370496327  | 0.364147908739 | 0.294413612094 |
| 13/12/05 21:14 | 160.196584 | -75.287964 | -1.4125   | 5  | 5 | 0.401207   | 231.777 | 0.246795432383  | 0.857037302652 | 0.465104852898 |
| 14/12/05 02:22 | 160.6805   | -75.182728 | 21.353125 | 6  | 6 | 0.366917   | 208.939 | 0.126679340731  | 0.864167124343 | 0.422400566441 |
| 17/12/05 03:17 | 160.426713 | -75.369163 | 20.03125  | 5  | 4 | 0.107784   | 162.715 | 0.226740560571  | 0.426425030627 | 0.28698521563  |
| 18/12/05 19:31 | 160.967864 | -75.302496 | -0.090625 | 7  | 5 | 0.384939   | 195.658 | 0.274944198648  | 0.723304582565 | 0.327757759277 |
| 19/12/05 04:38 | 160.399215 | -75.364974 | 14.303125 | 5  | 4 | 0.0536724  | 198.594 | 0.223569552588  | 0.45808924505  | 0.357205145941 |
| 19/12/05 09:43 | 160.589487 | -75.406128 | -1.045313 | 6  | 5 | 0.162063   | 139.6   | 0.225982432457  | 0.408186788459 | 0.307307185958 |
| 21/12/05 01:10 | 160.96606  | -75.260503 | 14.009375 | 6  | 4 | 0.123889   | 195.618 | 0.134975582546  | 0.359568563122 | 0.305029204331 |
| 22/12/05 09:56 | 160.492268 | -75.335528 | -1.70625  | 5  | 5 | 0.358276   | 238.511 | 0.261215155012  | 0.770970426322 | 0.400446327397 |
| 22/12/05 15:20 | 161.285112 | -75.130596 | 9.015625  | 6  | 4 | 0.00596226 | 211.02  | 0.0392460351537 | 0.499560561585 | 0.281101853684 |
| 24/12/05 01:19 | 160.35522  | -75.345387 | 20.765625 | 9  | 6 | 0.228823   | 175.978 | 0.22756343984   | 0.787443300178 | 0.370977357014 |
| 24/12/05 03:14 | 160.454176 | -75.367749 | 19.003125 | 10 | 6 | 0.324754   | 161.106 | 0.233275031359  | 0.75384464498  | 0.356027933959 |
| 24/12/05 13:30 | 160.85204  | -75.276191 | 9.1625    | 8  | 6 | 0.350157   | 154.375 | 0.160796904495  | 0.761657051771 | 0.353870461427 |
| 25/12/05 02:36 | 160.420906 | -75.322971 | 15.771875 | 11 | 6 | 0.453869   | 177.878 | 0.255142935529  | 0.792477702528 | 0.367048220918 |
| 25/12/05 13:54 | 160.476067 | -75.359336 | 12.834375 | 10 | 6 | 0.440278   | 162.13  | 0.242660351639  | 0.756131619824 | 0.34698435589  |
| 27/12/05 03:52 | 160.432093 | -75.353762 | 14.596875 | 8  | 4 | 0.248677   | 224.454 | 0.237039591602  | 0.767865068817 | 0.370214732293 |
| 28/12/05 20:11 | 160.474237 | -75.448226 | 19.957813 | 8  | 4 | 0.294043   | 188.747 | 0.200144023397  | 0.694148576101 | 0.321788062457 |
| 30/12/05 07:59 | 160.762035 | -75.279878 | 18.782812 | 12 | 6 | 0.289281   | 162.354 | 0.175475631747  | 0.771704272752 | 0.345069700191 |
| 12/01/06 11:55 | 160.498367 | -75.387317 | 15.184375 | 8  | 6 | 0.262018   | 151.615 | 0.232507910029  | 0.731949761163 | 0.359189049404 |
| 14/01/06 21:43 | 160.45684  | -75.358648 | 16.432813 | 9  | 6 | 0.292407   | 163.81  | 0.239101736044  | 0.759983414263 | 0.350393684098 |
| 15/01/06 12:09 | 161.061464 | -75.425412 | -1.853125 | 6  | 6 | 0.330604   | 106.121 | 0.19819699212   | 0.609106926402 | 0.303390640365 |
| 17/01/06 17:23 | 162.896066 | -75.711607 | -0.017187 | 8  | 5 | 0.50514    | 226.736 | 0.202418407739  | 0.82892990518  | 0.507238969457 |
| 23/01/06 13:24 | 161.843753 | -75.522465 | 20.471875 | 7  | 6 | 0.176537   | 118.176 | 0.154157213079  | 0.542030125103 | 0.361654089926 |
| 27/01/06 17:09 | 161.030504 | -75.470304 | 6.078125  | 6  | 6 | 0.251597   | 99.7853 | 0.152518649113  | 0.579360964965 | 0.339227707039 |
| 28/01/06 14:45 | 160.6307   | -75.401177 | 10.190625 | 7  | 5 | 0.143667   | 176.276 | 0.227480702252  | 0.698682955638 | 0.391163529781 |
| 28/01/06 23:02 | 160.804737 | -75.333689 | 3.728125  | 8  | 6 | 0.345858   | 143.62  | 0.218285138832  | 0.721761346689 | 0.32540153667  |
| 29/01/06 21:55 | 160.655528 | -75.403243 | 0.570313  | 10 | 6 | 0.353992   | 136.171 | 0.223762906733  | 0.69286524417  | 0.341956248791 |
| 30/01/06 13:11 | 160.453826 | -75.328554 | 19.884375 | 9  | 5 | 0.423007   | 207.5   | 0.257491963563  | 0.782708371922 | 0.408104950193 |
| 31/01/06 01:18 | 161.631688 | -75.134487 | 21.353125 | 4  | 4 | 0.40489    | 223.353 | 0.128472588014  | 0.614469581138 | 0.325444704107 |
| 01/02/06 11:04 | 160.868158 | -75.418942 | -1.11875  | 6  | 4 | 0.399738   | 161.807 | 0.200109849176  | 0.347994294053 | 0.322908617178 |
| 14/11/15 21:16 | 160.639202 | -75.283579 | 15.184375 | 8  | 4 | 0.392219   | 257.568 | 0.197187053957  | 0.787326388369 | 0.452520645666 |
| 15/11/15 01:30 | 162.452341 | -75.27404  | -0.384375 | 4  | 2 | 0.296083   | 183.725 | 0.0603326986441 | 0.1397770606   | 0.100054924588 |
| 15/11/15 15:09 | 160.344147 | -75.283796 | 12.246875 | 7  | 4 | 0.20531    | 274.787 | 0.252644620108  | 0.834859132528 | 0.526165192653 |
| 16/11/15 17:07 | 160.632457 | -75.485165 | -0.971875 | 6  | 4 | 0.235681   | 248.636 | 0.375801318108  | 0.639712639295 | 0.480099242033 |
| 16/11/15 17:07 | 160.742897 | -75.473794 | -0.971875 | 6  | 4 | 0.283457   | 242.597 | 0.356250066396  | 0.626973748747 | 0.450391052103 |
| 16/11/15 17:07 | 162.961412 | -75.528045 | 21.20625  | 6  | 3 | 0.473701   | 212.584 | 0.231724600911  | 0.383445551759 | 0.327873771764 |
| 16/11/15 17:07 | 161.54071  | -75.282001 | 11.21875  | 6  | 4 | 0.399865   | 167.35  | 0.18246605859   | 0.672853539795 | 0.234508001281 |
| 17/11/15 17:05 | 162.140822 | -75.18285  | 20.03125  | 5  | 3 | 0.297654   | 250.824 | 0.264014743171  | 0.539466159205 | 0.539466159205 |
| 18/11/15 01:12 | 160.431406 | -75.261373 | 19.590625 | 10 | 5 | 0.56642    | 228.443 | 0.302919395843  | 0.837685700335 | 0.470703129895 |

|                |            |            |           |    |   |           |         |                 |                |                |
|----------------|------------|------------|-----------|----|---|-----------|---------|-----------------|----------------|----------------|
| 18/11/15 07:43 | 160.725567 | -75.244248 | -0.090625 | 8  | 4 | 0.349565  | 247.613 | 0.36595734381   | 0.806348838977 | 0.391933349075 |
| 18/11/15 13:58 | 160.639143 | -75.280779 | 9.015625  | 12 | 6 | 0.508062  | 173.332 | 0.195058359716  | 0.789571095097 | 0.379447167899 |
| 18/11/15 18:41 | 162.939635 | -75.404983 | 21.20625  | 3  | 3 | 0.643968  | 218.147 | 0.186865539886  | 0.50339347027  | 0.212160758695 |
| 20/11/15 13:40 | 160.540074 | -75.230499 | 10.484375 | 9  | 5 | 0.433714  | 199.139 | 0.181046929096  | 0.455264475886 | 0.399177384611 |
| 21/11/15 04:15 | 160.139206 | -75.514698 | 15.91875  | 9  | 5 | 0.428624  | 154.739 | 0.114471049931  | 0.678811545434 | 0.533189793717 |
| 21/11/15 04:15 | 160.515586 | -75.441896 | 20.03125  | 8  | 4 | 0.355766  | 169.609 | 0.215742756652  | 0.428568114014 | 0.388174184763 |
| 21/11/15 04:15 | 160.776139 | -75.384842 | 19.517188 | 11 | 6 | 0.385922  | 132.984 | 0.236036848011  | 0.480601962811 | 0.329175090128 |
| 21/11/15 11:51 | 160.529845 | -75.278103 | 19.003125 | 11 | 6 | 0.428964  | 183.408 | 0.212478219222  | 0.518778164982 | 0.397546015218 |
| 21/11/15 20:09 | 160.600981 | -75.285028 | 21.20625  | 8  | 5 | 0.54929   | 175.245 | 0.204696389366  | 0.792133262352 | 0.342372634695 |
| 21/11/15 20:09 | 160.683318 | -75.300313 | 21.353125 | 7  | 5 | 0.149525  | 163.375 | 0.203694545097  | 0.767151007462 | 0.323386156951 |
| 21/11/15 20:09 | 160.365918 | -75.255796 | 11.953125 | 9  | 5 | 0.557646  | 203.4   | 0.232282180306  | 0.852637821355 | 0.38722090386  |
| 21/11/15 22:26 | 160.432093 | -75.353762 | 11.365625 | 12 | 6 | 0.246141  | 167.265 | 0.237039591602  | 0.767865068817 | 0.370214732293 |
| 22/11/15 00:58 | 160.586895 | -75.41523  | 15.184375 | 11 | 6 | 0.441423  | 137.004 | 0.217616043557  | 0.696265579162 | 0.362380741783 |
| 22/11/15 02:16 | 160.560972 | -75.345966 | -1.485937 | 11 | 6 | 0.562265  | 159.758 | 0.259093655344  | 0.751541482348 | 0.352534968842 |
| 22/11/15 16:25 | 160.47633  | -75.384533 | 11.953125 | 8  | 4 | 0.528264  | 193.634 | 0.22902483745   | 0.73785650547  | 0.404751379925 |
| 24/11/15 14:10 | 160.732278 | -75.290432 | 12.98125  | 9  | 5 | 0.405167  | 161.956 | 0.188496009957  | 0.767578185224 | 0.336389448051 |
| 24/11/15 22:26 | 159.280798 | -75.25208  | 20.9125   | 10 | 6 | 2.42095   | 279.341 | 0.267478929997  | 1.05248506862  | 0.652760896475 |
| 24/11/15 22:26 | 162.249076 | -75.073427 | 19.957813 | 7  | 4 | 0.34479   | 254.816 | 0.16465229622   | 0.326036457723 | 0.310143646304 |
| 24/11/15 22:26 | 162.426126 | -75.08658  | 19.590625 | 9  | 5 | 0.568698  | 265.622 | 0.13622114297   | 0.660815220778 | 0.336911953904 |
| 24/11/15 22:27 | 160.44191  | -75.210973 | 18.121875 | 8  | 6 | 0.475423  | 213.329 | 0.194119467959  | 0.486076133426 | 0.455180838976 |
| 26/11/15 15:49 | 160.278885 | -75.171806 | -0.971875 | 10 | 5 | 0.372703  | 279.155 | 0.223246696132  | 0.932497579961 | 0.540520164127 |
| 27/11/15 17:17 | 160.442957 | -75.339758 | 11.659375 | 12 | 6 | 0.470929  | 170.858 | 0.248039194164  | 0.776249444149 | 0.375715882556 |
| 28/11/15 11:18 | 160.770417 | -75.286162 | 5.490625  | 6  | 4 | 0.189822  | 216.504 | 0.179675463647  | 0.334705018683 | 0.334705018683 |
| 28/11/15 11:18 | 160.726472 | -75.277843 | -1.559375 | 9  | 5 | 0.445912  | 166.372 | 0.178922731462  | 0.468843332814 | 0.344183868409 |
| 28/11/15 22:08 | 160.816999 | -75.37286  | -0.090625 | 9  | 6 | 0.538693  | 133.009 | 0.246991484493  | 0.688931611465 | 0.331560091027 |
| 29/11/15 17:28 | 160.597192 | -75.376022 | 10.190625 | 11 | 6 | 0.464216  | 148.067 | 0.254106017717  | 0.722952947817 | 0.343469807054 |
| 01/12/15 08:39 | 160.148337 | -75.205343 | 16.653125 | 10 | 5 | 0.516501  | 250.961 | 0.315922686943  | 0.92722755535  | 0.557830306398 |
| 01/12/15 08:39 | 160.234708 | -75.311778 | 7.253125  | 9  | 5 | 0.384592  | 225.901 | 0.232281280985  | 0.83300653002  | 0.506907119784 |
| 01/12/15 10:06 | 160.692662 | -75.235904 | 1.378125  | 10 | 5 | 0.442812  | 225.217 | 0.366026591574  | 0.818022932744 | 0.417202487559 |
| 05/12/15 04:10 | 160.613183 | -75.21012  | -1.045313 | 11 | 6 | 0.232608  | 201.508 | 0.154430606847  | 0.850889540154 | 0.431079019938 |
| 05/12/15 20:57 | 160.409732 | -75.28658  | -0.971875 | 12 | 6 | 0.444338  | 190.227 | 0.241157585235  | 0.821798284845 | 0.411650075964 |
| 06/12/15 06:33 | 160.574297 | -75.322854 | -1.559375 | 8  | 5 | 0.354397  | 165.693 | 0.238313930317  | 0.513962297783 | 0.30704458405  |
| 07/12/15 05:37 | 160.792979 | -75.308515 | 11.953125 | 9  | 5 | 0.327885  | 151.225 | 0.196553032225  | 0.456590075933 | 0.33792908664  |
| 07/12/15 16:27 | 160.693216 | -75.258301 | 16.946875 | 8  | 4 | 0.233395  | 229.901 | 0.169001415506  | 0.475548674707 | 0.386641740746 |
| 08/12/15 07:46 | 160.78169  | -75.297339 | 12.834375 | 10 | 5 | 0.379772  | 155.355 | 0.187947423778  | 0.457515477865 | 0.342130717183 |
| 08/12/15 09:59 | 160.388075 | -75.331382 | 11.659375 | 10 | 5 | 0.473355  | 177.831 | 0.243270991009  | 0.562099386061 | 0.314574603856 |
| 08/12/15 20:34 | 160.529651 | -75.264105 | -1.853125 | 7  | 4 | 0.401162  | 188.076 | 0.203195421606  | 0.517642321794 | 0.341964342686 |
| 08/12/15 22:14 | 160.541883 | -75.353684 | 15.184375 | 8  | 4 | 0.496436  | 158.883 | 0.259620657805  | 0.423234237569 | 0.273967535384 |
| 09/12/15 01:03 | 160.388164 | -75.350979 | 21.353125 | 12 | 6 | 0.55903   | 171.575 | 0.230135499633  | 0.777593030628 | 0.379474147547 |
| 09/12/15 02:07 | 162.886729 | -75.097313 | 20.03125  | 4  | 2 | 0.740984  | 346.661 | 0.348957467493  | 0.72796666577  | 0.538462516293 |
| 09/12/15 09:43 | 160.574534 | -75.336852 | -1.853125 | 8  | 4 | 0.677792  | 161.444 | 0.249621100868  | 0.516714221897 | 0.284810655986 |
| 09/12/15 23:30 | 162.628566 | -75.158186 | 19.076563 | 6  | 3 | 0.22538   | 286.284 | 0.0644914315464 | 0.385834149944 | 0.264211694603 |
| 10/12/15 03:28 | 162.176017 | -75.647536 | 7.10625   | 6  | 3 | 0.0743024 | 156.537 | 0.250582475665  | 0.32152096394  | 0.272590674005 |
| 10/12/15 22:40 | 162.330494 | -75.548245 | -0.2375   | 4  | 2 | 0.353842  | 181.862 | 0.154262433706  | 0.358058602145 | 0.256160967587 |
| 11/12/15 09:33 | 160.739187 | -75.342215 | 11.953125 | 12 | 6 | 0.572935  | 146.8   | 0.232951275581  | 0.725276794847 | 0.341636989621 |
| 12/12/15 13:33 | 160.426713 | -75.369163 | 20.03125  | 12 | 6 | 0.645508  | 162.715 | 0.226740560571  | 0.75768025163  | 0.37440197369  |
| 12/12/15 13:33 | 160.434993 | -75.374058 | 19.664063 | 12 | 6 | 0.413764  | 160.499 | 0.225696448186  | 0.752700707898 | 0.374495503137 |
| 13/12/15 02:31 | 160.404511 | -75.329977 | 21.20625  | 10 | 5 | 0.539162  | 176.972 | 0.247274770799  | 0.79009360095  | 0.314230163681 |
| 13/12/15 10:45 | 159.954599 | -75.800041 | 9.45625   | 4  | 2 | 0.654124  | 295.291 | 0.295352503851  | 0.310542945097 | 0.302948174135 |
| 13/12/15 10:45 | 160.5856   | -75.34244  | 5.196875  | 6  | 3 | 0.254186  | 158.901 | 0.252642821464  | 0.287316165981 | 0.275172626336 |
| 14/12/15 14:48 | 160.366021 | -75.289392 | 6.078125  | 9  | 6 | 0.397747  | 192.751 | 0.251613997547  | 0.56151662566  | 0.417351774945 |
| 15/12/15 01:18 | 160.325029 | -75.301295 | 21.132812 | 9  | 5 | 0.362293  | 192.256 | 0.254659100505  | 0.486482626792 | 0.348680476439 |
| 15/12/15 12:49 | 161.324073 | -75.311036 | 19.44375  | 6  | 3 | 0.263041  | 145.322 | 0.185289928432  | 0.327077872143 | 0.325386248202 |
| 16/12/15 22:51 | 160.638787 | -75.263981 | 14.303125 | 10 | 5 | 0.443035  | 234.243 | 0.182675600524  | 0.803112180518 | 0.419654937578 |
| 17/12/15 02:11 | 159.94971  | -75.325499 | -1.559375 | 10 | 5 | 0.827599  | 276.502 | 0.359357222544  | 0.875347490548 | 0.576169272586 |

|                |            |            |           |    |   |            |         |                 |                |                |
|----------------|------------|------------|-----------|----|---|------------|---------|-----------------|----------------|----------------|
| 17/12/15 17:36 | 160.848692 | -75.336394 | 1.378125  | 6  | 3 | 0.476902   | 158.093 | 0.216758090745  | 0.335056653431 | 0.283093851041 |
| 17/12/15 22:52 | 160.427114 | -75.425155 | 21.20625  | 7  | 4 | 0.225151   | 143.656 | 0.199905703172  | 0.577403141829 | 0.28515419684  |
| 20/12/15 08:01 | 160.097253 | -75.352283 | 0.05625   | 6  | 3 | 0.34057    | 314.853 | 0.344474349288  | 0.638622661509 | 0.535608069515 |
| 20/12/15 11:07 | 160.319558 | -75.34189  | 20.104688 | 12 | 6 | 0.319018   | 179.957 | 0.223431956382  | 0.796274638348 | 0.396622411929 |
| 21/12/15 17:09 | 160.868271 | -75.271953 | 5.490625  | 10 | 5 | 0.637682   | 153.845 | 0.15514376888   | 0.76288822305  | 0.375125927582 |
| 21/12/15 17:09 | 160.813309 | -75.260877 | -1.265625 | 10 | 5 | 0.624118   | 163.124 | 0.152349576651  | 0.779932166125 | 0.37123276435  |
| 21/12/15 21:01 | 160.628274 | -75.283593 | 7.840625  | 11 | 6 | 0.346709   | 173.369 | 0.199009079531  | 0.789009918415 | 0.379231330713 |
| 23/12/15 17:03 | 160.471183 | -75.419532 | 17.68125  | 7  | 4 | 0.460512   | 142.843 | 0.212346918268  | 0.565005993491 | 0.279590094064 |
| 23/12/15 21:32 | 160.212852 | -75.30617  | 10.778125 | 10 | 5 | 0.496688   | 199.71  | 0.23366173965   | 0.602261290338 | 0.356865202374 |
| 24/12/15 03:40 | 160.355154 | -75.317391 | 19.296875 | 11 | 6 | 0.498465   | 184.854 | 0.247430353436  | 0.807894772818 | 0.40326480131  |
| 24/12/15 03:40 | 160.465003 | -75.350944 | 19.590625 | 8  | 5 | 0.202852   | 165.62  | 0.245386195426  | 0.442947367171 | 0.288936743514 |
| 24/12/15 05:50 | 160.404511 | -75.329977 | 12.98125  | 7  | 4 | 0.387266   | 176.972 | 0.247274770799  | 0.461161327656 | 0.293023260892 |
| 24/12/15 12:05 | 160.914538 | -75.26834  | 17.901563 | 10 | 5 | 0.239698   | 149.68  | 0.146970734126  | 0.420081216019 | 0.352264273038 |
| 25/12/15 14:35 | 160.567429 | -75.404752 | 19.957813 | 12 | 6 | 0.438481   | 141.452 | 0.22919301059   | 0.707209423784 | 0.361218818268 |
| 26/12/15 00:14 | 161.232083 | -75.238613 | 1.81875   | 3  | 2 | 0.00136538 | 254.678 | 0.336826518351  | 0.336826518351 | 0.336826518351 |
| 26/12/15 00:14 | 161.984904 | -75.493508 | -0.090625 | 4  | 2 | 0.55777    | 357.723 | 0.110412411523  | 0.31029832962  | 0.210355820232 |
| 26/12/15 00:14 | 162.023154 | -75.464527 | -0.017187 | 5  | 3 | 0.785895   | 206.779 | 0.0806153686189 | 0.323043515419 | 0.280092814842 |
| 26/12/15 00:14 | 162.925962 | -75.326669 | 18.85625  | 6  | 3 | 0.757809   | 281.388 | 0.145496746014  | 0.590207682854 | 0.19721133564  |
| 27/12/15 12:12 | 160.71658  | -75.317057 | 16.359375 | 10 | 5 | 0.495082   | 155.602 | 0.213342467286  | 0.477304150482 | 0.317081013172 |
| 29/12/15 07:00 | 160.311383 | -75.250201 | -0.971875 | 8  | 4 | 0.848345   | 209.122 | 0.241505622697  | 0.865892023184 | 0.398894997627 |
| 29/12/15 07:00 | 160.300424 | -75.292195 | -0.971875 | 8  | 4 | 0.366866   | 196.99  | 0.258041449065  | 0.835974291319 | 0.380627077846 |
| 29/12/15 17:47 | 161.000307 | -75.294004 | -1.559375 | 9  | 5 | 0.713408   | 134.224 | 0.165163110892  | 0.725971071127 | 0.390035780487 |
| 30/12/15 07:21 | 159.974205 | -75.213548 | 11.071875 | 10 | 5 | 0.513918   | 241.261 | 0.294398323627  | 0.950484012079 | 0.467722778093 |
| 30/12/15 15:01 | 160.66694  | -75.301737 | 10.04375  | 6  | 3 | 0.235491   | 164.369 | 0.207262153908  | 0.322672095596 | 0.316299502696 |
| 30/12/15 15:45 | 160.144121 | -75.10035  | 2.99375   | 6  | 3 | 0.240765   | 261.802 | 0.257196086755  | 0.55333459769  | 0.41550097108  |
| 30/12/15 18:09 | 160.583339 | -75.213656 | 6.078125  | 10 | 5 | 0.471005   | 202.354 | 0.162833867932  | 0.852364427587 | 0.413491886613 |
| 30/12/15 19:52 | 160.398934 | -75.311781 | 15.771875 | 10 | 5 | 0.345365   | 183.136 | 0.259158406499  | 0.556096414341 | 0.331676103514 |
| 31/12/15 04:44 | 160.796456 | -75.245513 | 14.74375  | 12 | 6 | 0.44988    | 170.154 | 0.14221332283   | 0.795149587019 | 0.383616422864 |
| 31/12/15 12:28 | 160.168567 | -75.35654  | 21.353125 | 12 | 6 | 0.559683   | 187.882 | 0.186558871218  | 0.813360849539 | 0.425322462338 |
| 01/01/16 10:11 | 160.151608 | -75.399923 | 7.9875    | 6  | 3 | 0.371261   | 310.726 | 0.28732156191   | 0.51903447164  | 0.51903447164  |
| 02/01/16 10:12 | 160.421001 | -75.336969 | -1.853125 | 10 | 5 | 0.529845   | 173.462 | 0.245641602762  | 0.554943484043 | 0.306138067871 |
| 03/01/16 08:14 | 160.322297 | -75.320193 | 14.890625 | 9  | 5 | 0.572366   | 186.6   | 0.239733959133  | 0.576673792006 | 0.331721968916 |
| 04/01/16 21:51 | 160.542631 | -75.404077 | 13.421875 | 10 | 5 | 0.373286   | 143.285 | 0.23210501395   | 0.542794548468 | 0.311096927206 |
| 05/01/16 01:00 | 160.475776 | -75.33134  | 16.359375 | 12 | 6 | 0.475802   | 170.918 | 0.259867971246  | 0.77689965367  | 0.37472123286  |
| 05/01/16 18:23 | 160.803925 | -75.308493 | 16.946875 | 11 | 6 | 0.481085   | 150.232 | 0.195306572479  | 0.742160658676 | 0.353208560725 |
| 05/01/16 19:30 | 162.688279 | -75.106446 | 4.315625  | 7  | 4 | 0.794789   | 320.952 | 0.118625016429  | 0.795976063575 | 0.502441088689 |
| 05/01/16 19:30 | 162.800898 | -75.200534 | -0.090625 | 7  | 4 | 0.501541   | 289.911 | 0.0680446512113 | 0.703104919975 | 0.44491238488  |
| 07/01/16 01:29 | 160.61973  | -75.266106 | 20.104688 | 12 | 6 | 0.361757   | 179.873 | 0.187609278854  | 0.804310976218 | 0.391788558297 |
| 07/01/16 22:53 | 160.759651 | -75.291782 | 21.353125 | 12 | 6 | 0.523047   | 159.016 | 0.185923050843  | 0.76236211991  | 0.361329434826 |
| 08/01/16 04:49 | 160.300333 | -75.362187 | 19.590625 | 12 | 6 | 0.436926   | 174.873 | 0.205914070821  | 0.785298418148 | 0.398412061924 |
| 09/01/16 01:12 | 160.836089 | -75.288826 | 14.009375 | 12 | 6 | 0.718654   | 152.48  | 0.173966570092  | 0.753487614303 | 0.36115226847  |
| 09/01/16 01:12 | 160.847216 | -75.2944   | 12.246875 | 12 | 6 | 0.519338   | 149.874 | 0.177814767244  | 0.747274201328 | 0.358454303652 |
| 11/01/16 15:16 | 160.709255 | -75.245676 | -1.11875  | 7  | 5 | 0.468006   | 178.948 | 0.156945110057  | 0.807542238748 | 0.376768988156 |
| 12/01/16 03:28 | 160.376879 | -75.269792 | 17.534375 | 10 | 5 | 0.313943   | 198.103 | 0.237658324867  | 0.556970554942 | 0.37305838721  |
| 12/01/16 04:58 | 160.449517 | -75.464339 | 20.61875  | 7  | 4 | 0.382919   | 166.497 | 0.190058131587  | 0.447645423241 | 0.321047021454 |
| 12/01/16 23:38 | 160.484297 | -75.358631 | 20.839063 | 12 | 6 | 0.394881   | 161.728 | 0.244775556056  | 0.755219707716 | 0.358989400007 |
| 13/01/16 06:52 | 160.852995 | -75.148797 | 21.353125 | 8  | 5 | 0.526927   | 218.084 | 0.0738592150544 | 0.458770930827 | 0.440226019992 |
| 14/01/16 16:37 | 160.410101 | -75.348172 | 12.834375 | 10 | 5 | 0.331663   | 170.759 | 0.236214913689  | 0.559962597925 | 0.296890343797 |
| 14/01/16 22:57 | 160.727305 | -75.308639 | 6.959375  | 12 | 6 | 0.503062   | 157.069 | 0.204674805648  | 0.753705250132 | 0.354641180043 |
| 15/01/16 23:21 | 160.779105 | -75.302244 | 10.851562 | 12 | 6 | 0.307116   | 154.218 | 0.192587023943  | 0.750956023982 | 0.356309421622 |
| 16/01/16 03:31 | 160.589901 | -75.276642 | -0.2375   | 12 | 6 | 0.520121   | 178.909 | 0.200489362894  | 0.80051493972  | 0.389345101494 |
| 16/01/16 04:31 | 160.410067 | -75.342573 | 11.659375 | 10 | 5 | 0.259804   | 172.546 | 0.239847273655  | 0.558793479838 | 0.302043456599 |
| 17/01/16 23:46 | 160.420982 | -75.334169 | 5.490625  | 10 | 5 | 0.402992   | 174.347 | 0.247507695095  | 0.554403891079 | 0.308738006634 |
| 20/01/16 03:52 | 160.81689  | -75.286767 | 19.517188 | 10 | 5 | 0.404345   | 154.96  | 0.174346983131  | 0.447068958091 | 0.35567539989  |
| 20/01/16 17:36 | 160.256534 | -75.328583 | 9.603125  | 10 | 5 | 0.641465   | 189.308 | 0.222423816862  | 0.594549607567 | 0.331784921428 |

|                |            |            |           |    |   |           |         |                |                |                |
|----------------|------------|------------|-----------|----|---|-----------|---------|----------------|----------------|----------------|
| 21/01/16 09:35 | 160.355154 | -75.317391 | 21.353125 | 10 | 5 | 0.49732   | 184.854 | 0.247430353436 | 0.567972855469 | 0.33080016427  |
| 21/01/16 09:35 | 160.355167 | -75.32299  | 21.353125 | 10 | 5 | 0.858302  | 183.095 | 0.24332764827  | 0.568873975718 | 0.325665937222 |
| 23/01/16 18:09 | 160.388202 | -75.359378 | -1.853125 | 10 | 5 | 0.631057  | 168.852 | 0.22479712658  | 0.567888319238 | 0.296530615155 |
| 23/01/16 23:14 | 160.420982 | -75.334169 | -1.853125 | 8  | 4 | 0.382702  | 174.347 | 0.247507695095 | 0.554403891079 | 0.290385550622 |
| 24/01/16 09:47 | 160.492461 | -75.352326 | 10.04375  | 10 | 5 | 0.583693  | 163.078 | 0.250149002651 | 0.540497681087 | 0.285142505659 |
| 24/01/16 10:52 | 160.808143 | -75.1013   | -1.853125 | 8  | 4 | 0.376255  | 250.537 | 0.462102018056 | 0.489668923242 | 0.477046045181 |
| 24/01/16 17:36 | 160.748957 | -75.300201 | 11.953125 | 10 | 5 | 0.380229  | 157.556 | 0.194575424013 | 0.46620921983  | 0.333728355419 |
| 26/01/16 18:48 | 160.530943 | -75.356494 | 13.715625 | 10 | 5 | 0.420193  | 158.855 | 0.255738286432 | 0.531998192589 | 0.277917355877 |
| 27/01/16 05:38 | 161.44937  | -75.339165 | 19.517188 | 8  | 4 | 0.663684  | 129.068 | 0.199825663549 | 0.472733798081 | 0.267804484419 |
| 27/01/16 05:38 | 160.752961 | -75.34429  | 19.517188 | 8  | 4 | 0.317849  | 145.14  | 0.233336185228 | 0.371424319852 | 0.293585336895 |
| 27/01/16 08:11 | 160.46476  | -75.325747 | 7.546875  | 6  | 3 | 0.117389  | 173.534 | 0.258295057758 | 0.312614982077 | 0.261441784057 |
| 28/01/16 06:31 | 160.40935  | -75.222187 | -0.384375 | 8  | 4 | 0.404555  | 211.522 | 0.206369127553 | 0.489409019298 | 0.37371309334  |
| 28/01/16 10:57 | 160.448453 | -75.341155 | 10.63125  | 8  | 4 | 0.413881  | 169.988 | 0.24821096459  | 0.448408947284 | 0.286151544501 |
| 29/01/16 06:19 | 161.155409 | -75.329899 | 10.778125 | 8  | 4 | 0.51221   | 113.479 | 0.197733841493 | 0.407404378662 | 0.285584971889 |
| 29/01/16 13:39 | 160.448501 | -75.346754 | -1.70625  | 8  | 4 | 0.429288  | 168.219 | 0.244670335428 | 0.44763373206  | 0.285691091839 |
| 30/01/16 00:12 | 160.497668 | -75.328524 | -0.384375 | 6  | 3 | 0.347594  | 170.065 | 0.254921702414 | 0.307221750406 | 0.265942888694 |
| 30/01/16 19:46 | 160.900165 | -75.249478 | 15.478125 | 8  | 4 | 0.440759  | 156.839 | 0.131322538183 | 0.395594487333 | 0.366677700416 |
| 30/01/16 22:16 | 160.338741 | -75.329991 | 20.03125  | 7  | 4 | 0.373674  | 182.202 | 0.235361457485 | 0.477669275054 | 0.302342930694 |
| 31/01/16 13:15 | 160.377123 | -75.334184 | 17.534375 | 8  | 4 | 0.182121  | 177.813 | 0.239313975943 | 0.467372941988 | 0.296408307416 |
| 31/01/16 17:02 | 160.619182 | -75.375995 | 19.296875 | 8  | 4 | 0.526463  | 146.497 | 0.252578070309 | 0.401601955661 | 0.270947613431 |
| 02/02/16 23:58 | 160.563659 | -75.342463 | 2.553125  | 6  | 3 | 0.0374889 | 160.606 | 0.255818326055 | 0.288821630349 | 0.270606770543 |
