# Supplementary figures and images for: Cryo-seismicity triggered by ice mass discharge through the Antarctic subglacial hydrographic network
Source: Copernicus journal article supplement (doi:10.5194/egusphere-2022-29), 2022-04-13

eqks per month

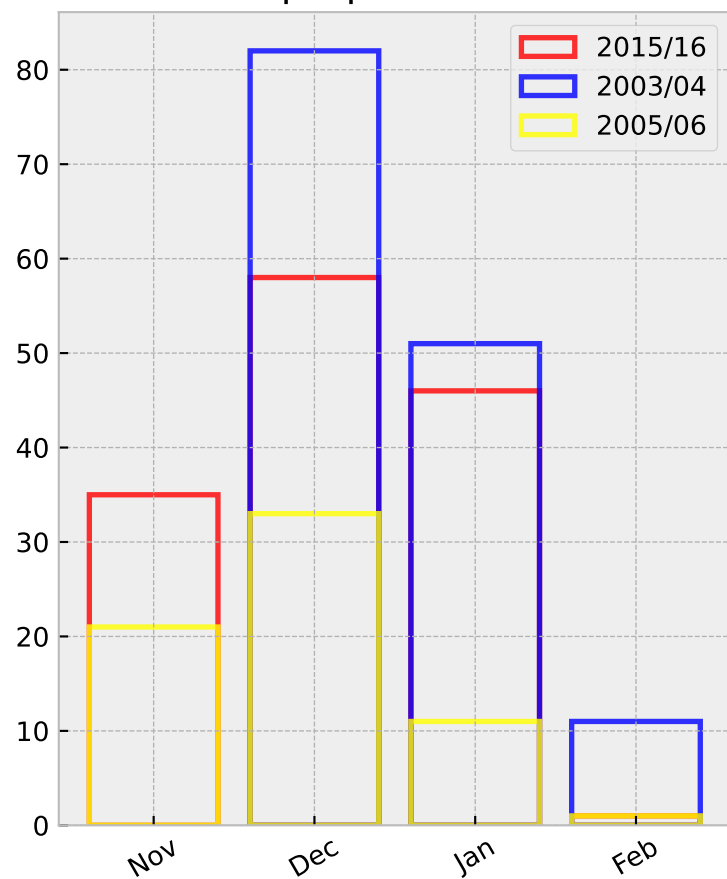

phases used

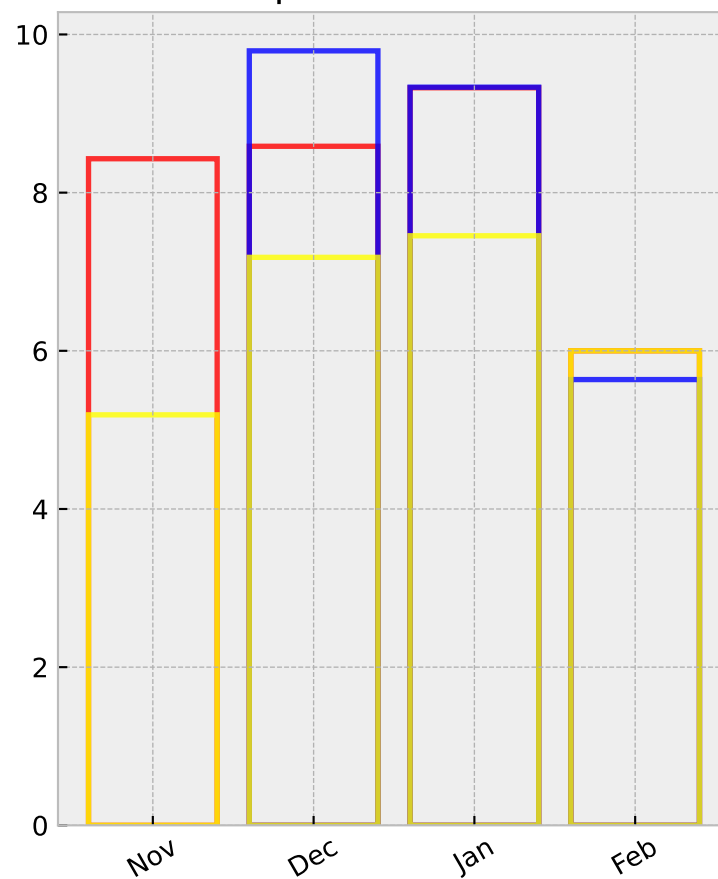

stations used

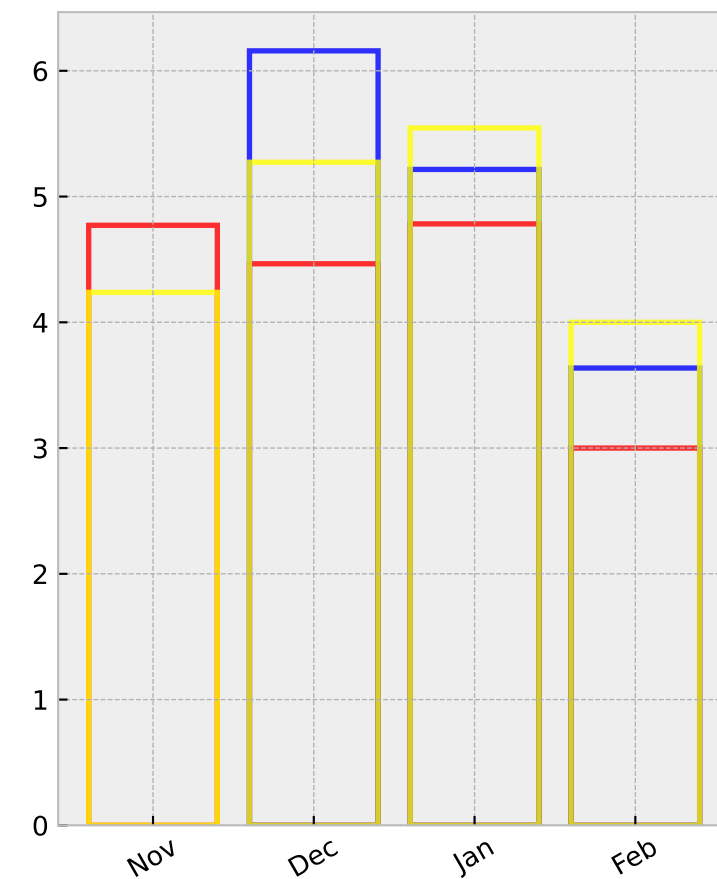

standard error

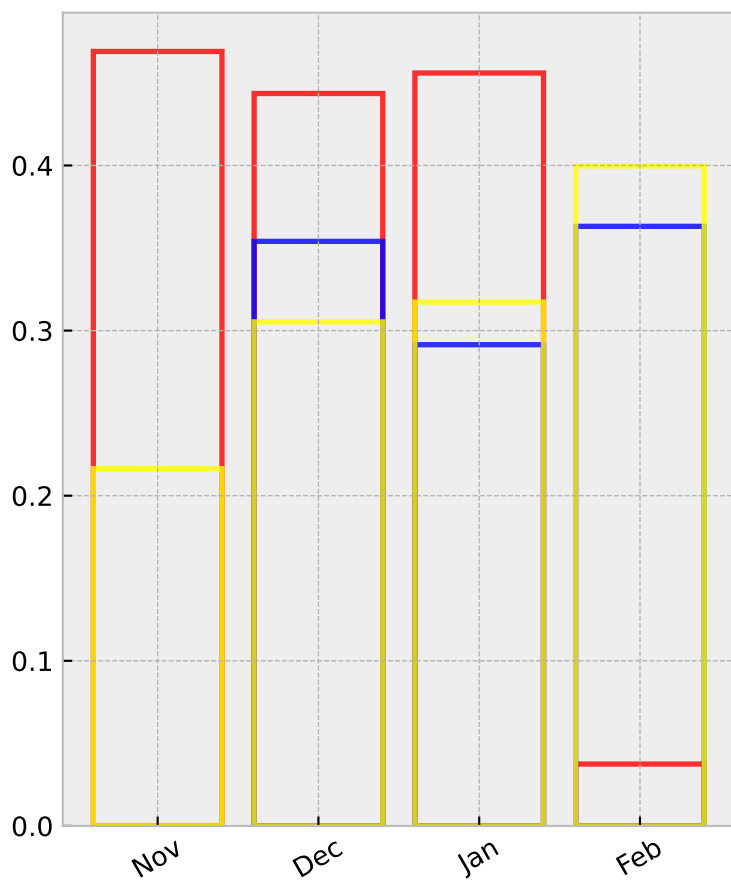

azimuthal gap

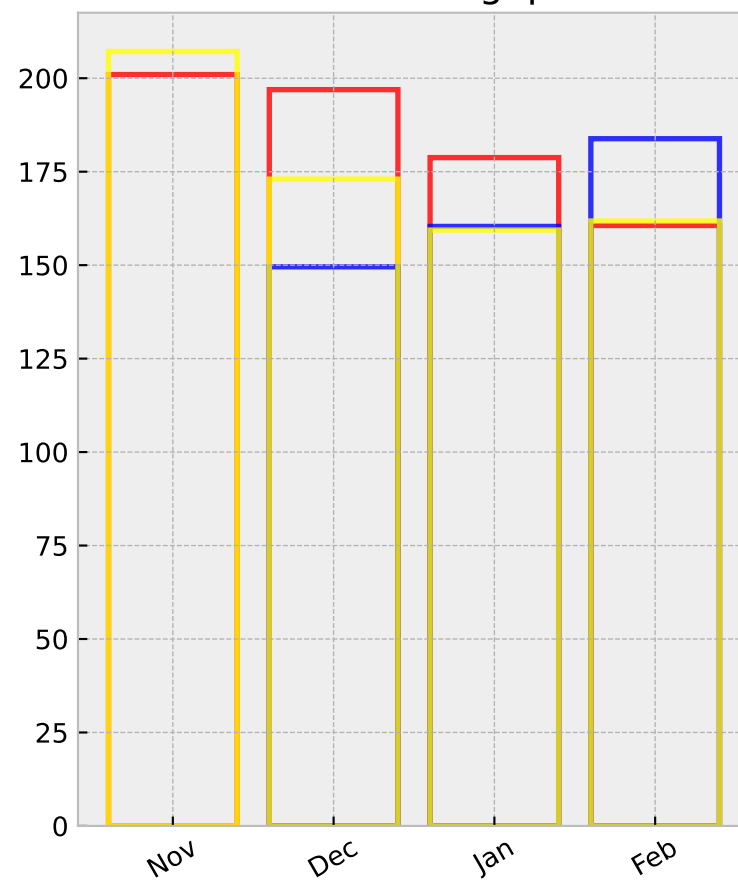

mean distance

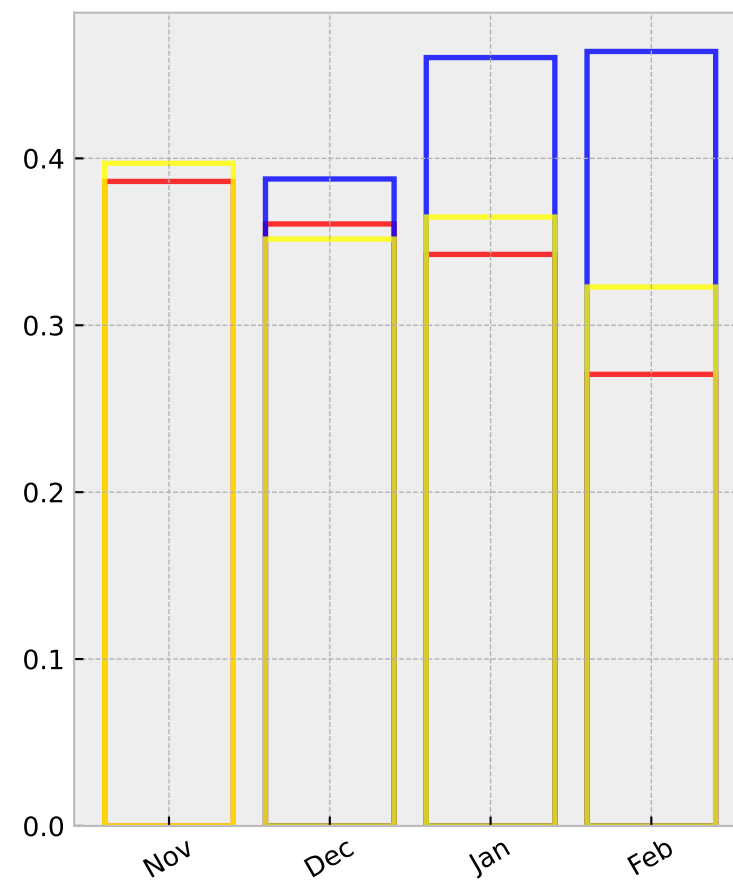

Supplement: Supplementary file 1 [file egusphere-2022-29-supplement.zip]
